# Supplementary material for: Oral bioavailability and sex specific tissue partitioning of quantum dots in fathead minnows, Pimephales promelas
Source: Royal Society of Chemistry journal article supplement (doi:10.1039/c5en00122f), 2015-01-01
Supplement: c5en00122f1.pdf [file c5en00122f1.pdf]

Supplementary Material

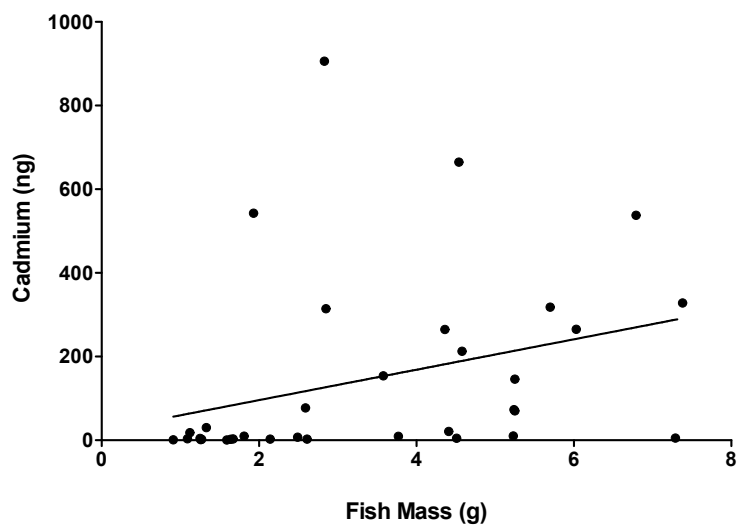

Figure S1. Correlation between fish mass and internalized QDs from the multiple dose experiment. Correlation analysis was performed on rank by the Spearman method and found a significant ( $p = 0.0001$ ) positive ( $r = 0.6127$ ) correlation between fish size and the total internalized dose.
